# Supplementary material for: Stem Cells from Healthy and Tendinopathic Human Tendons: Morphology, Collagen and Cytokines Expression and Their Response to T3 Thyroid Hormone
Source: MDPI journal article supplement (doi:10.3390/cells11162545), 2022-08-16
Supplement: s1 [file s1]

## Supplementary Materials

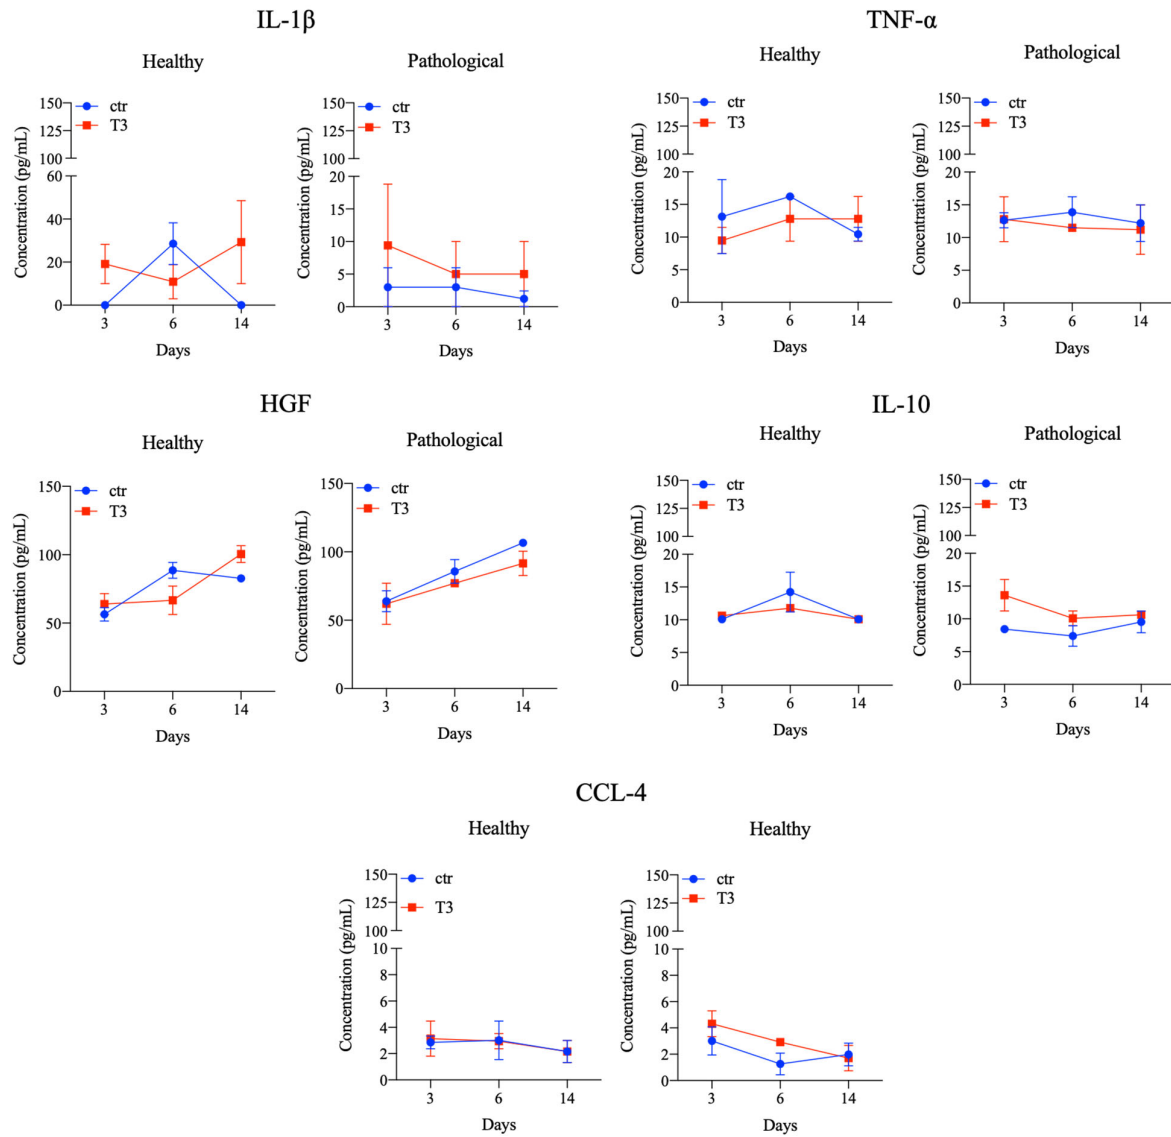

**Figure S1. Cytokine profiles of healthy and pathological tissue-derived Tendon Stem/Progenitor Cells (TSPCs) cultured in a medium supplemented with T3 (10-6 M) up to 14 days.** Cytokine levels (pg/mL) were measured in culture medium at various time points (3, 6 and 14 days) using a bead-based multiplex immunoassay. Results are shown as mean $\pm$ SD (N = 2).
